## 1 **First evidence of microplastics in human ovarian follicular fluid: an emerging threat to female fertility**

2 **Luigi Montano<sup>a,b,\*,1</sup>, Salvatore Raimondo<sup>c,1</sup>, Marina Piscopo<sup>d</sup>, Maria Ricciardi<sup>e</sup>, Antonino Guglielmino<sup>f</sup>, Sandrine Chamayou<sup>f</sup>, Raffaella**  
3 **Gentile<sup>c</sup>, Mariacira Gentile<sup>c</sup>, Paola Rapisarda<sup>g</sup>, Gea Oliveri Conti<sup>g</sup>, Margherita Ferrante<sup>g,2</sup>, Oriana Motta<sup>h,2</sup>**

4  
5 <sup>a</sup>Andrology Unit and Service of Lifestyle Medicine in UroAndrology, Local Health Authority (ASL) Salerno, Coordination Unit of the Network for  
6 Environmental and Reproductive Health (Eco-Food Fertility Project), “S. Francesco di Assisi Hospital”, 84020 Oliveto Citra, SA, Italy

7 <sup>b</sup>PhD Program in Evolutionary Biology and Ecology, University of Rome “Tor Vergata”, 00133 Rome, Italy

8 <sup>c</sup>“Gentile s.a.s.” research center - Gragnano (NA), Italy

9 <sup>d</sup>Department of Biology, University of Naples Federico II, Via Cinthia, 21, 80126 Naples, Italy

10 <sup>e</sup>Department of Chemistry and Biology, University of Salerno, via Giovanni Paolo II, 84084 Fisciano (SA) Italy,

11 <sup>f</sup>Centro HERA-Unità di Medicina della Riproduzione, Via Barriera del Bosco, 51/53, Sant'Agata li Battiati, 95030 Catania, Italy.

12 <sup>g</sup>Environmental and Food Hygiene Laboratory (LIAA), Department of Medical, Surgical and Advanced Technology "G.F. Ingrassia", University of  
13 Catania, Catania, Italy; International Society of Doctors for Environments - ISDE, Catania Section, Italy

14 <sup>h</sup>Department of Medicine Surgery and Dentistry "Scuola Medica Salernitana", University of Salerno, Via S. Allende, 84081 Baronissi (SA), Italy.

15  
16 \*Correspondence to: L. Montano, Andrology Unit and Service of Lifestyle Medicine in UroAndrology, Local Health Authority (ASL) Salerno,  
17 Coordination Unit of the Network for Environmental and Reproductive Health (Eco-Food Fertility Project), “S. Francesco di Assisi Hospital”, 84020  
18 Oliveto Citra, SA, Italy.

19  
20 E-mail addresses: [luigimontano@gmail.com](mailto:luigimontano@gmail.com) (L. Montano) and [l.montano@aslsalerno.it](mailto:l.montano@aslsalerno.it)

21 <sup>1</sup>These authors contributed equally as co-first. <sup>2</sup>These authors contributed equally as co-last

22 **Abstract**

23 Plastic pollution is a pressing global issue, with over 400 million tons produced annually and projections of 1.1 billion tons by 2050. Microplastics  
24 (MPs), ranging from 5 mm to 1  $\mu\text{m}$ , are pervasive in the environment. They are found in air, sea, freshwater, soils, food chains and studies show that  
25 tiny MPs, smaller than 10  $\mu\text{m}$ , can cross cellular membranes, posing potential health risks through oxidative stress, inflammation, immune dysfunction,  
26 neurotoxicity and reprotoxicity.

27 In recent years, research has shown that microplastics have negative effects on the female reproductive systems of animals. However, there is still a  
28 lack of evidence on how the accumulation of microplastics affects the reproductive health of human females. This study aimed to examine the presence  
29 of microplastics in the ovarian follicular fluid of 18 women undergoing assisted reproductive treatment whose samples were processed using a patented  
30 method endorsed nationally and internationally. Plastic particles  $<10 \mu\text{m}$  were measured using SEM with EDX detection. Preventive measures were  
31 taken to avoid contamination during the process. Microplastics (dimensions  $<10 \mu\text{m}$ ) were detected in 14 out of 18 samples of follicular fluid, with  
32 an average of 2191 p/ml (0 - 7181p/ml) and with a mean diameter of MPs of 4.48  $\mu\text{m}$  (3.18-5.54  $\mu\text{m}$ ). A significant correlation was found between  
33 microplastic concentration and FSH (p-value  $<0.05$ ), as well as a weak correlation with BMI, age and Estradiol. There was no correlation with  
34 fertilization outcomes, miscarriages, or live birth. This is the first study to provide evidence for microplastics' presence in ovarian follicular fluid in  
35 women undergoing assisted reproductive treatment, representing a potential threat to female reproductive function.

36

37 **Keywords: microplastics, ovarian follicular fluid, female fertility, reproductive health, plastic pollution.**

38

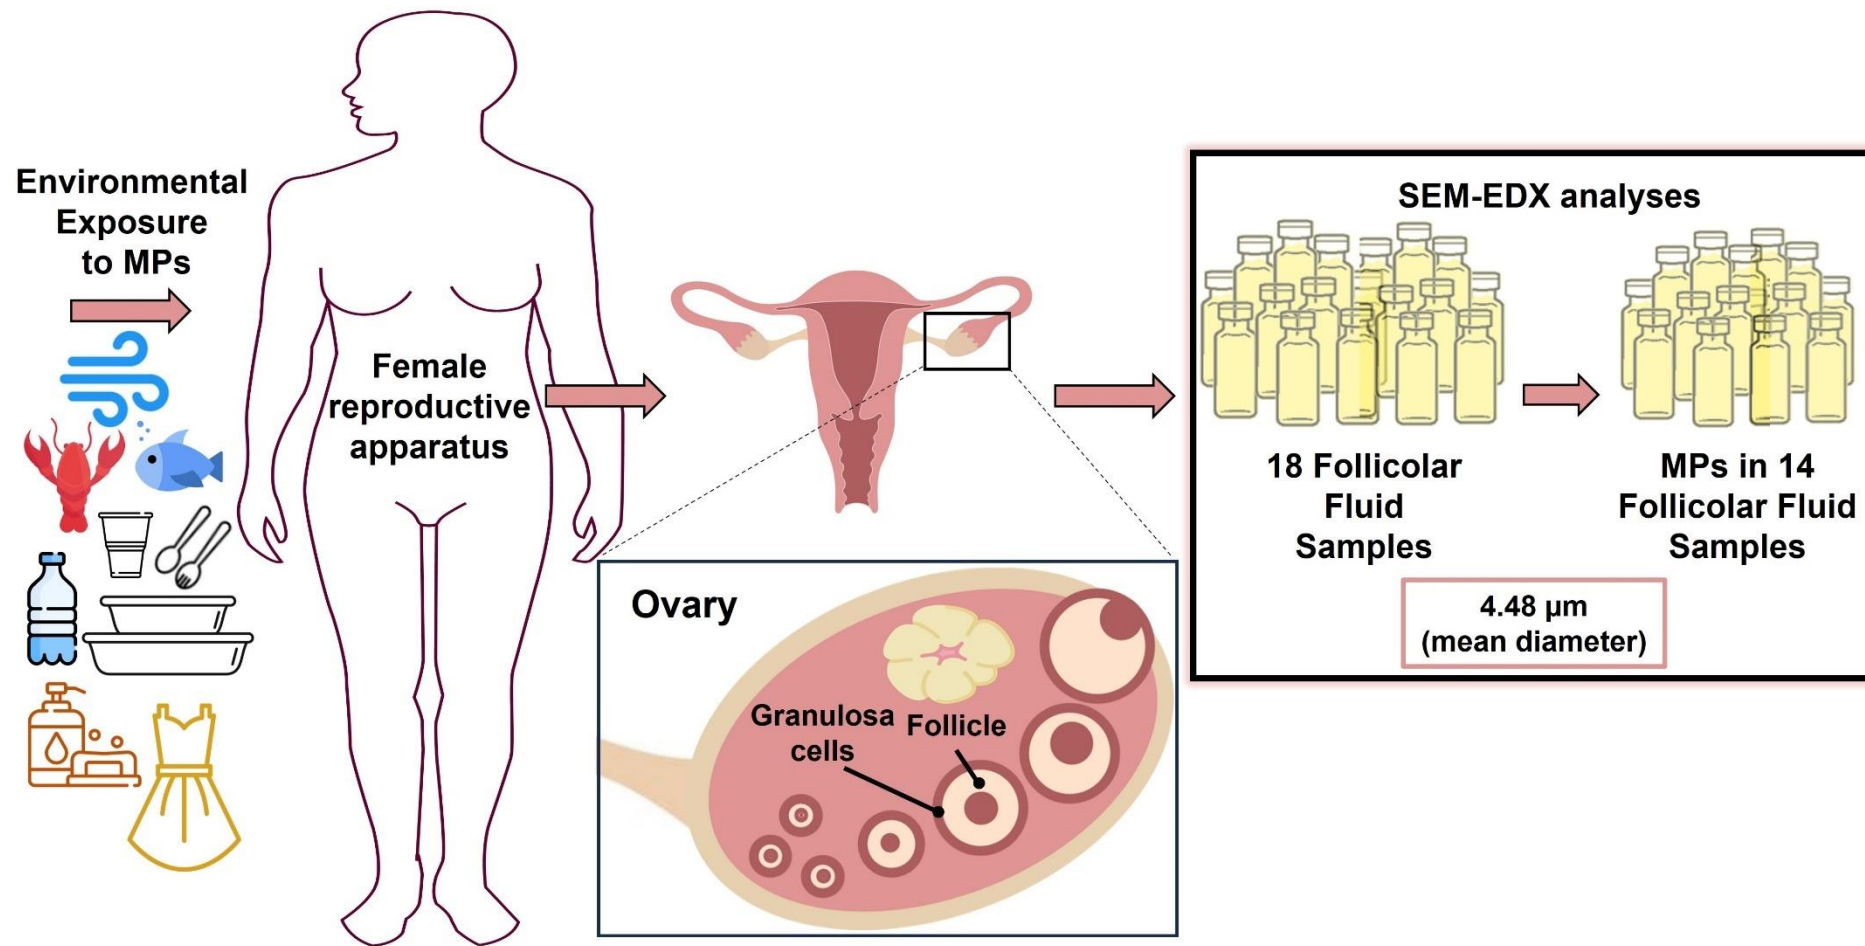

39  
40  
41  
42  
43  
44

## 45 **1. Introduction**

46

47 The increasing presence of plastic and its degradation products in the environment has become a global emergency. Every year, over 400 million tons  
48 of plastic are produced and this number is expected to increase even further, being highly likely that by 2050, annual production will reach 1.1 billion  
49 tons (UNEP, 2021). The pervasiveness of plastic is deeply influencing the planet's ecosystem and biogeochemical cycles to a point where it has  
50 become a ubiquitous and distinctive element in the Earth's geology at every latitude, so much so that the term "Plasticene" can be defined as the  
51 geological era characterized by this massive presence (Rangel-Buitrago and Neal, 2023).

52 From the degradation process of plastic, particles of plastic on a micrometric scale are created, known as microplastics, ranging from 5 mm to 1  $\mu\text{m}$   
53 in size, and nanoplastics with a diameter smaller than 1 $\mu\text{m}$ . Microplastics (MPs) can have different shapes (fibers, fragments, spheres, beads, films,  
54 scales, pellets, and foam) and colors depending on the original form of the large plastics from which they derive. MPs derived by fragmentation of  
55 plastic wastes are called "secondary" MPs, while "primary" MPs are specifically produced by humans both for their abrasive properties and to improve  
56 the stability of certain products, consequently MPs are intentionally added in cosmetics, toothpaste, household products, detergents, and paints formula  
57 (Ricciardi et al., 2021). Due to their small size, they are transported everywhere, and therefore we find them increasingly in the air, sea and freshwaters,  
58 soils, and being bioconcentrated in the food chain (Ferrante et al., 2022; Garrido Gamarro, 2022; Liu et al., 2023; Oliveri Conti et al., 2020) MPs  
59 reach humans (Pironti et al., 2021).

60 There is a growing concern regarding human health. MPs primarily enter the human body through the ingestion of food and beverages, as well as  
61 through inhalation, and finally through skin absorption of MPs contained in cosmetics (Yang et al., 2023). Especially, the large consumption of water  
62 mineral PET bottles results in a concentration of MPs between 110,000 and 370,000 particles (90% are nanoplastics and 10% microplastics) (Qian et  
63 al., 2024). Thanks to the use of an extremely sensitive methodology, the Estimated Daily Intake (EDI) of 1,531,524 p/kg/body-weight/day,  
64 corresponding to 40.1  $\mu\text{g}/\text{kg}/\text{body-weight}/\text{day}$ , and 3,350,208 p/kg/body-weight/day, corresponding to 87.8  $\mu\text{g}/\text{kg}/\text{body-weight}/\text{day}$ , was evaluated.  
65 Several studies on mammals indicate that MPs smaller than 10  $\mu\text{m}$  can cross cellular membranes, posing potential health risks through oxidative  
66 stress, inflammation (Pulvirenti et al., 2022), immune dysfunction (Yang et al., 2022), neurotoxicity (Wang et al., 2022), altered biochemical and

67 energy metabolism, impaired cell proliferation, gut microbiota alteration (Huang et al., 2021) or disrupted microbial metabolic pathways, abnormal  
68 tissue development, and carcinogenicity (Haddadi et al., 2022; Najahi et al., 2022). Evidence continues to accumulate in this regard, particularly  
69 concerning endocrine disruption (Ullah et al., 2023), and reproductive toxicity (Huang et al., 2023).

70 Furthermore, MPs, due to their hydrophobic surface, act as a Trojan horse for other types of notoriously toxic environmental contaminants (such as  
71 dioxins, polychlorinated biphenyl ethers, bisphenols, phthalates, polybrominated diphenyls, polycyclic aromatic hydrocarbons, and heavy metals)  
72 which can bind to them and, through processes of bioaccumulation and biomagnification, cause additional harm to living organisms through  
73 synergistic effects (Schell et al., 2022; Ullah et al., 2023). Beyond that, nano and MPs can serve as vehicles for microorganisms and promote infections  
74 (Beans, 2023).

75 All of this toxic burden to which the population is increasingly exposed represents one of the reasons why in recent decades there has been a decline  
76 in human fertility (Aitken, 2022; Pan et al., 2024). A recent report from the World Health Organization (WHO) estimates a global prevalence of 17.5%  
77 of couple infertility (WHO, 2023) and a recent meta-analysis has recorded a global decrease in total sperm count of 62.3% from 1973 to 2018 (Levine  
78 et al., 2023). Moreover, this has also been accompanied by an increase in the incidence of testicular tumors and a decrease in testosterone, because  
79 the male reproductive system is particularly sensitive to environmental contaminants (Gallo et al., 2020; Montano, 2020; Montano et al., 2018).  
80 However, there are areas within the same country or region that have higher pollution rates, accompanied by a higher incidence of reproductive  
81 problems for both males (Bergamo et al., 2016; Ferrero et al., 2024; Lettieri et al., 2020) and females (Ding et al., 2022; Xue et al., 2021).

82 Therefore, the significant impacts that environmental contaminants have on reproductive function are alerting the scientific community and  
83 policymakers to the increasing burden and potentially adverse effects on human health, starting from the reproductive health of emerging contaminants  
84 such as nano and MPs. In this regard, the discovery of MPs in the human seminal fluid has greatly heightened these concerns (Montano et al., 2023).  
85 Although there is currently a lack of evidence of reproductive effects in humans, several studies on animals demonstrate significant alterations in male  
86 reproductive function. In male mice exposed to polystyrene particles (PS-MPs 5.0-5.9  $\mu\text{m}$ ) in saline solution for six weeks, a reduction in sperm  
87 motility, an increase in abnormal sperm forms, and a decrease in testosterone levels were observed (Coffin et al., 2022).

88 Another study following exposure to PS-MPs observed processes of desquamation, atrophy, and apoptosis of germ cells in much of the seminiferous  
89 epithelium with increased levels of interleukins, effects closely related to the nuclear factor erythroid 2-related factor 2 (Nrf2)/heme oxygenase-1  
90 (HO-1)/nuclear factor-kappa B (NF-κB) signaling pathway (Hou et al., 2021). As revealed in an in vivo study on mouse sperm, polystyrene  
91 nanoplastics (PS-NP) trigger elevated ubiquitination of Ras-related C3 botulinum toxin substrate 1 (RAC1) and cell division cycle 42 (CDC42) (Xu  
92 et al., 2023). The calculated minimal human equivalent MPs dose causing a reduced semen quality was 0.016 mg/kg/day (Zhang et al., 2022).

93 On the female sex, ovarian functionality is also particularly sensitive to the effects of various endocrine disruptors that induce reproductive health  
94 issues, such as infertility, imbalances in sex hormones, and premature ovarian insufficiency (Ding et al., 2022). Although there is a lack of studies on  
95 the effects of MPs on humans, there is evidence from animal models demonstrating their adverse effects. In a study on mice, after administration of  
96 polyethylene MPs (PE-MPs) of 10-150 μm, (40 mg/kg/day) for 30 days, reduced oocyte maturation was observed, with a decreased capacity for  
97 fertilization of these oocytes, alterations in the development of the resulting embryos, related to oxidative stress damage with implications for DNA  
98 and mitochondrial dysfunction in the exposed oocytes (Zhang et al., 2023). Another study has shown a reduction in plasma levels of 17β-estradiol  
99 (E2) and testosterone (T) in female *Oryzias melastigma* after 60 days of exposure to PS-MPs (Wang et al., 2019). Exposure to 0.5 μm PS-MPs (0,  
100 0.015, 0.15 and 1.5 mg/day for 90 days) has been shown to induce overproduction of reactive oxygen species (ROS) and thus oxidative stress  
101 contributes to ovarian tissue alterations (An et al., 2021).

102 In any case, these findings in mammals lead us to consider that nano and microplastics can also accumulate in ovarian tissue and therefore produce  
103 adverse effects on female fertility.

104 The main purpose of this preliminary study was therefore to verify the presence of microplastics in the follicular fluid of 18 women undergoing  
105 assisted reproduction according to a protocol developed by some of the authors. This study, to the best of our knowledge, represents the first evidence  
106 of MPs in human follicular fluid. Although still limited in numbers, this discovery should serve as an important warning signal about the invasiveness  
107 of these emerging contaminants in the female reproductive system, considering that they can alter its composition and have an impact on the oocyte  
108 (Gosden et al., 1988; Petro et al., 2012), thus posing a significant reproductive risk for our species.

109 **aterials and methods**

110 *2.1 Patients' enrolment*

111 The study was performed in accordance with the guidelines and regulations described by the Code of Ethics of the World Medical Association  
112 (Declaration of Helsinki) and falls within the scope of the EcoFoodFertility project (<https://www.ecofoodfertility.it>, accessed on 08 Febr 2024),  
113 approved by the Ethical Committee of the Local Health Authority Campania Sud-Salerno (Committee code n. 43 of 30 June 2015). EcoFoodFertlity  
114 is a human biomonitoring project which is investigating the presence of various contaminants in biological fluids and their potential effects on  
115 reproductive health. All patients were fully informed about the project and signed an informed consent to participate. N.18 ovarian follicular samples  
116 were collected from women undergoing assisted reproductive treatment at IVF (In Vitro Fertilisation) center of Mediterraneo PMA (medically assisted  
117 procreation) in Salerno (Campania Region, Southern Italy) between February 2019 and January 2020. Every participant had declared to consume  
118 plastic packaged food and plastic bottled water or beverages during the three years before sampling. N.4 women out of 18 participants had secondary  
119 infertility. The primary infertility causes included declined ovarian reserve (DOR), polycystic ovary syndrome (PCOS), tubal factors, advanced age,  
120 and unexplained infertility.

121 The principal characteristics of study participants can be summarized in Table 1. More detailed information on all participant parameters can be found  
122 in the supporting material.

123 **Table 1.** Main characteristics of study participants.

|                        |             |
|------------------------|-------------|
| Number of participants | 18          |
| Age                    | 35.9±5.8    |
| Menarche               | 11.9±1.15   |
| Nulliparous            | 14 (77.78%) |
| Pluriparous            | 4 (22.22%)  |
| Contraceptives         | 10 (55.56%) |



|                                |                           |            |            |
|--------------------------------|---------------------------|------------|------------|
| Previous PMA                   | IUI                       | 6 (33.3%)  |            |
|                                | FIVET                     | 1 (5.6%)   |            |
|                                | ICSI                      | 6 (33.3%)  |            |
| Previous Abortions             | Spontaneous               | 7 (38.9%)  |            |
|                                | Volunteer                 | 1 (5.6%)   |            |
| Body mass index (BMI)          |                           | 26.9±3.97  |            |
| Waist circumference (cm)       |                           | 82,57±11.3 |            |
| Waist-to-hip ratio             |                           | 0.74±0.11  |            |
| Ferriman-Gallwey               |                           | Score 1    | 8 (44.4%)  |
|                                |                           | Score 2    | 10 (55.6%) |
| Smoker                         | Yes                       | 2 (11.1%)  |            |
|                                | No                        | 10 (55.6%) |            |
|                                | Previous                  | 6 (33.3 %) |            |
| Alcohol                        | No                        | 14 (77.8%) |            |
|                                | Occasional                | 4 (22.2%)  |            |
| 3° day of cycle                | FSH mUI/mL                | 6.52±1.38  |            |
|                                | Estradiol pg/mL           | 60.6±28.8  |            |
|                                | AMH ng/mL                 | 2.42±2.05  |            |
| Gynecologic al medical history | Normovulatory             | 7 3 (8.9%) |            |
|                                | Polycystic ovary syndrome | 6 (33.3%)  |            |
|                                | Endometriosis             | 3 (16.7 %) |            |
|                                | Oligomenorrhea            | 2 (11.1%)  |            |
| n. oocytes - pick-up           |                           | 127        |            |



|                      |             |
|----------------------|-------------|
| Oocytes metaphase I  | 10 (7.9%)   |
| Oocytes metaphase II | 117 (92.1%) |
| Fertilized oocytes   | 117 (92.1%) |
| Blastocyst           | 107 (91.5%) |
| Transfers performed  | 17 (94.4%)  |
| Beta HCG > 400 UI/mL | 8 (47.1%)   |
| Miscarriages         | 4 (23.5%)   |
| Live birth           | 4 (23.5%)   |

124 IUI: Intra-uterine insemination; FIVET: In Vitro Fertilisation and Embryo-Transfer; ICSI: IntraCyttoplasmic Sperm Injection.

125

## 126 *2.2 Collection of biological samples*

127 For follicular fluids sampling, BD glass tubes treated with reinforced USP Type III non-siliconized, 5 ml with red cap without additives were used  
128 and always stored horizontally. For the pick-up, Wallace 17G needles were used for all patients, in place of Falcon conical tubes in PPE, preheated  
129 BD glass tubes were used (Becton, Dickinson and Company, 2100 Derry Road West Mississauga, Ontario, Canada), follicular fluid was observed in  
130 preheated glass Petri dishes and then placed in BD glass tubes. All follicular fluids were processed to assess the possible presence of blood traces with  
131 the Albumin test, only suitable ones were stored at -20°C and analyzed for MPs.

## 132 *2.3 Extraction and dosage of MPs*

133  
134 The samples of follicular fluid were prepared for extracting MPs according to a new patented method nationally and internationally protected  
135 (PCT/IB2019/051838 of March 7, 2019 coupled with the accepted Italian patent number 102018000003337 of March 07, 2018) validated with a  
136 recovery >81% (calculated using fortified samples with microparticles based on 3 µm red PS particles purchased from Merck – Sigma Aldrich,

137 Germany, with a recovery ranging of 83–103%) and a LOD of 0.1  $\mu\text{m}$  (Zuccarello et al., 2019a, 2019b). This methodological approach doesn't use  
138 the filtration step to avoid the irremediable loss of NPs or MPs with size lowest to the pore filter diameter.

139 We identified and measured extracted MPs (as the sum of all types of plastics) focusing our results on MPs <10  $\mu\text{m}$  (for better biological plausibility  
140 of their occurrence in this biological fluid against MPs with the highest sizes). Qualitative and quantitative determinations were performed using a  
141 Zeiss Scanning Electron Microscopy (SEM Zeiss LEO-1430) coupled with an EDX (X Energy Dispersion Detector) detector using the AZTEC  
142 Version 5.1 software. The EDX use permitted us to discriminate between plastic and not-plastic particles. The calculation was applied to an overall  
143 reading area within 1  $\text{mm}^2$  of stub (Aluminium-Copper stub, coated with pure gold), examining 228 fields at 1500 X magnification. Results were  
144 expressed as the number of particles per ml (p/ml) of follicular fluid sample.

145 To prevent potential cross-samples or environmental sample contamination from personal synthetic clothing (nylon, polyester, etc...) and plastics use  
146 during the process of sample preparation, authors adopted the following preventive measures: glassware and metal equipment were used whenever  
147 possible thoroughly rinsed with filtered (1  $\mu\text{m}$  - Whatman glass filter) Ultra-Performance Liquid Chromatography-Mass Spectrometry (UPLC-MS)  
148 Grade water and acetone; dust-free nitrile gloves were worn, use only of clean 100% cotton-based laboratory coats; all samples were extracted in a  
149 clean room under a horizontal laminar flow cabinet with controlled access; sample containers were preserved with glass box and protected by  
150 aluminium foil when not handled. Three reagent blanks were run with each batch of samples, and any measurable MPs weren't detected in these  
151 blanks, showing that any potential contamination occurring from the sample treatment was null.

#### 152 153 *2.4 Dosage of biochemical markers* 154

155 To determine the concentrations of hFSH, hLH, and Estradiol, an immunoassay in chemiluminescence with paramagnetic particles was used, using  
156 the Access 2 Immunoassay System by Beckman Coulter according to the manufacturer's instructions. The values are expressed as follows: hLH and  
157 hFSH in mIU/mL; Estradiol in pg/mL. For the quantitative measurement of circulating anti-Müllerian Hormone the ELFA (Enzyme Linked  
158 Fluorescent Assay) technique was used, with an automatic VIDAS analyzer from BioMerieux-France, according to the manufacturer's instructions.  
159 Values are expressed in ng/mL.

160

161 *2.5 Statistical analysis*

162

163 A statistical descriptive analysis was carried out using the Excel 2021 (Microsoft, Excel 2021). A preliminary explorative analysis of data suggested  
164 to authors the application of Pearson's correlation test to evaluate the positive, negative, or null linear correlation between the pair of variables. For  
165 each pair of variables, Pearson's product moment correlation coefficient "*r*" was calculated as null, weak, moderate and straight force of linear  
166 correlation approaching the Interpretation data suggested by (Chen and Anderson, 2023). The interpretation of the *r* value  
167 (<https://www.ncl.ac.uk/webtemplate/ask-assets/external/maths-resources/statistics/regression-and-correlation/strength-of-correlation.html>) is  
168 reported in the supporting material.

169 The significance level was set at *p-value* = 0.05. A *p-value* > 0.05 means that deviation from the null hypothesis is not statistically significant and the  
170 null hypothesis is not rejected (Andrade, 2019).

171

172 **3. Results and discussion**

173 In the present study, microplastics (dimensions <10 μm) were detected in human follicular fluid in 14 out of 18 participants, with an average of 2191  
174 p/ml (0 - 7181p/ml) and with a mean diameter of MPs of 4.48 μm (3.18-5.54 μm) (see Tab. 1). Results for all samples showing the details are reported  
175 in Table 2 and Figure 1. These latter shows that the total concentration of MPs in sample N. 18 is the highest, followed by samples No. 4 and No. 7.  
176 No correlation was found between microplastic concentration, fertilization, miscarriages, and live birth. Instead, a moderate correlation was found  
177 between MPs <10 μm and FSH (*r* = 0.52) with a *p-value* <0.05. In addition, weak correlations between MPs <10 μm with BMI (*r* = 0.31), age (*r* =  
178 0.24) and E2 (*r* = 0.22) but all with *p* >0.05, were found (See Supporting material).

179 Probably, the weak correlations could be justified by the limited number of analyzed samples.

180

181

182

183 **Table 2.** Results of MPs in the follicular fluid samples

184

| <b>ID samples</b> | <b>MPs &lt;10µm (p/ml)</b> | <b>Average diameter µm (particles &lt;10 µm)</b> |
|-------------------|----------------------------|--------------------------------------------------|
| 1                 | 442                        | 4.12                                             |
| 2                 | 2276                       | 4.78                                             |
| 3                 | 1101                       | 4.58                                             |
| 4                 | 5600                       | 4.94                                             |
| 5                 | 3601                       | 3.9                                              |
| 6                 | 3736                       | 5.5                                              |
| 7                 | 4566                       | 3.66                                             |
| 8                 | 0                          |                                                  |
| 9                 | 4326                       | 4.76                                             |
| 10                | 0                          |                                                  |
| 11                | 2431                       | 5.44                                             |
| 12                | 0                          |                                                  |
| 13                | 897                        | 5.44                                             |
| 14                | 0                          |                                                  |
| 15                | 1242                       | 5.28                                             |
| 15                | 1816                       | 5.22                                             |
| 17                | 2875                       | 5.32                                             |
| 18                | 7181                       | 4.5                                              |
|                   |                            |                                                  |
| min               | 0                          | 3.66                                             |
| max               | 7181                       | 5.54                                             |
| average           | 2196                       | 4.46                                             |

185

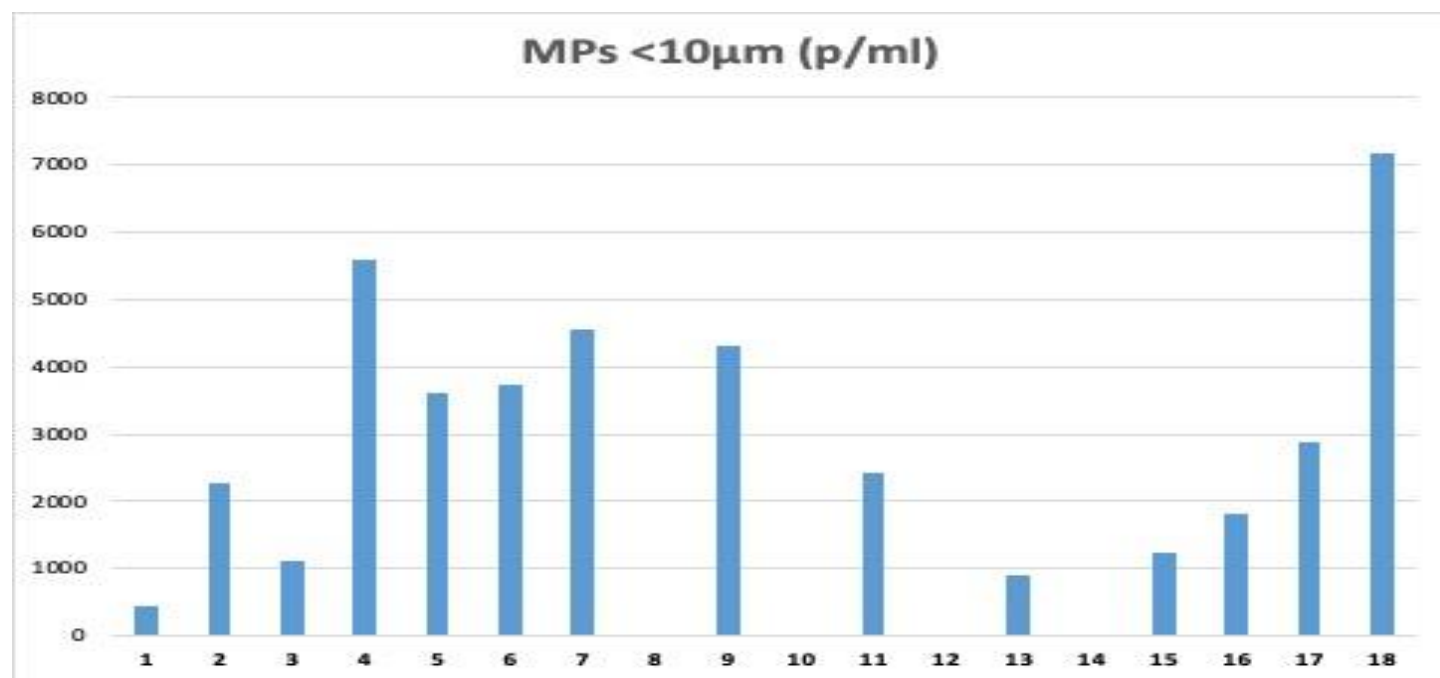

186  
187

188 **Figure 1.** Concentration of MPs in follicular fluid samples.

189

190 Scanning Electron Microscope (SEM) is a useful tool in providing high-resolution particle surface structure characteristics of the material. In this  
191 study, a field emission scanning electron microscope was used to visualize microplastics and evaluate the size and shape of the particles in human  
192 follicular fluid samples. Figure 2 shows the selected SEM images of typical microplastics isolated from human ovarian follicular fluid.

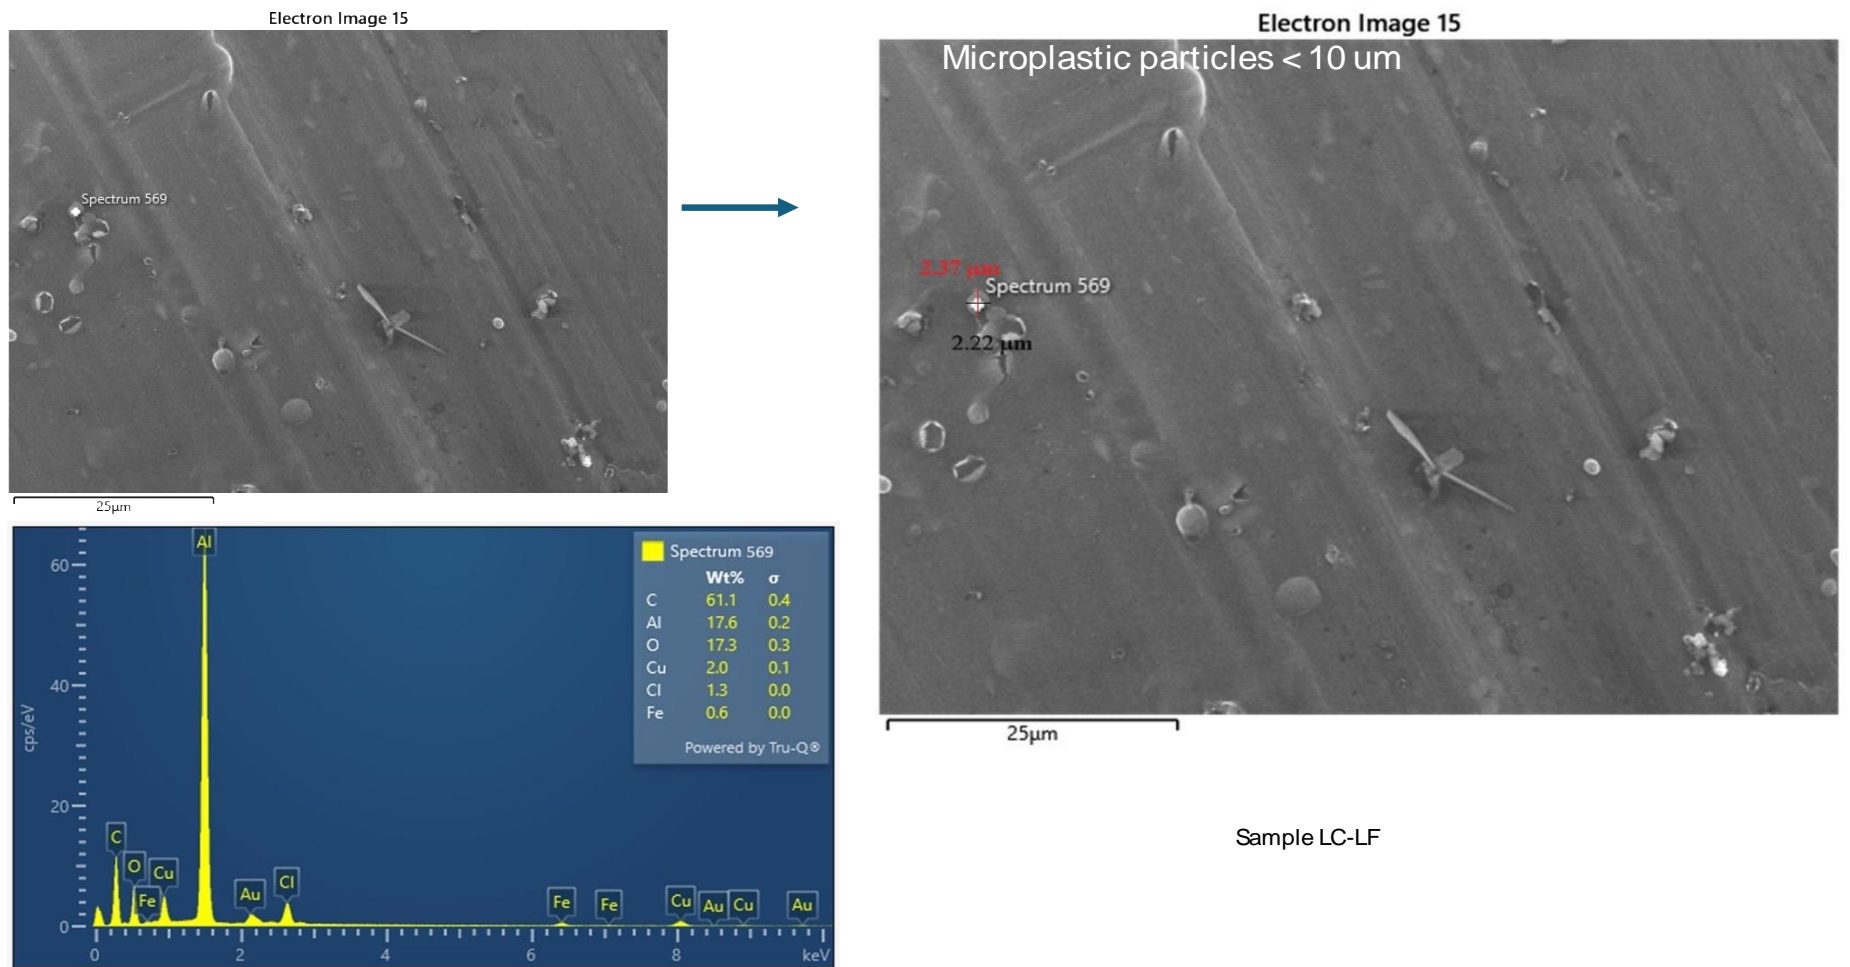

193

194 **Figure 2.** Selected SEM-EDX image microplastics in follicular fluid.

195

196

197

#### 198 **4. Discussion**

199 The usage behaviors of plastic products of the participants are very similar since all of them declared to use plastic-made items in their life, therefore  
200 trying to understand and differentiate a possible exposure route is hardly truthful. We can only speculate that micro and nano plastics enter the human  
201 body by ingestion and/or inhalation and direct skin contact as now globally recognized (Pironti et al., 2021).

202 Thousands of micro and nano plastic particles can be accumulated by adults during their lifetime (Lim, 2021), as they have been found in various  
203 human tissues, including kidneys, liver, hair, lungs, and spleen (Kutralam-Muniasamy et al., 2023) but also in meconium, breast milk, placenta, blood  
204 (Leslie et al., 2022), urine (Pironti et al., 2023) and sperm (Montano et al., 2023). In literature is reported that MNP exposure was associated with  
205 microstructural changes in the reproductive system of female animals, such as oviduct dilatation, an increase in the number of ovarian cysts and corpus  
206 luteum, a thinner granular layer of secondary follicles, and a decrease in the number of developing follicles (An et al., 2021; Hou et al., 2021; Park et  
207 al., 2020). A potential mechanism that may explain the presence of MPs in the human ovarian follicular fluid could be related to the possibility that  
208 MPs pass from the bloodstream to the follicle and thus cross the blood-follicle barrier, which is a more dynamic and less stable barrier than the blood-  
209 testicular barrier, perhaps closer to the placental barrier. Therefore, microplastics could enter the ovaries through the circulatory system reaching the  
210 granulosa cells (Figure 3). The biggest cells in the follicle, ovarian granulosa cells (GCs), are responsible for secreting estrogen and progesterone. GC  
211 proliferation and differentiation impact all major ovarian functional processes, including follicular growth and development, ovulation, luteal  
212 formation, and steroid hormone production. MPs have been demonstrated to enter rat ovarian GCs, resulting in a substantial decrease in blood levels  
213 of anti-Mullerian hormone (AMH) and E2 expression, as well as enhanced expression of fibrosis markers (An et al., 2021). This ultimately led to  
214 sluggish follicular development and an irregular estrous cycle. In addition, it has been reported that PS-MPs lowered cytoskeletal protein levels in rat  
215 ovaries, including  $\alpha$ -microtubulin, breaking physical-functional linkages between the ovarian stroma and parenchyma and compromising oocyte-cell  
216 synchronization (Haddadi et al., 2022). This work also reported on the location and accumulation of PS-MPs in the rat ovary (Haddadi et al., 2022).



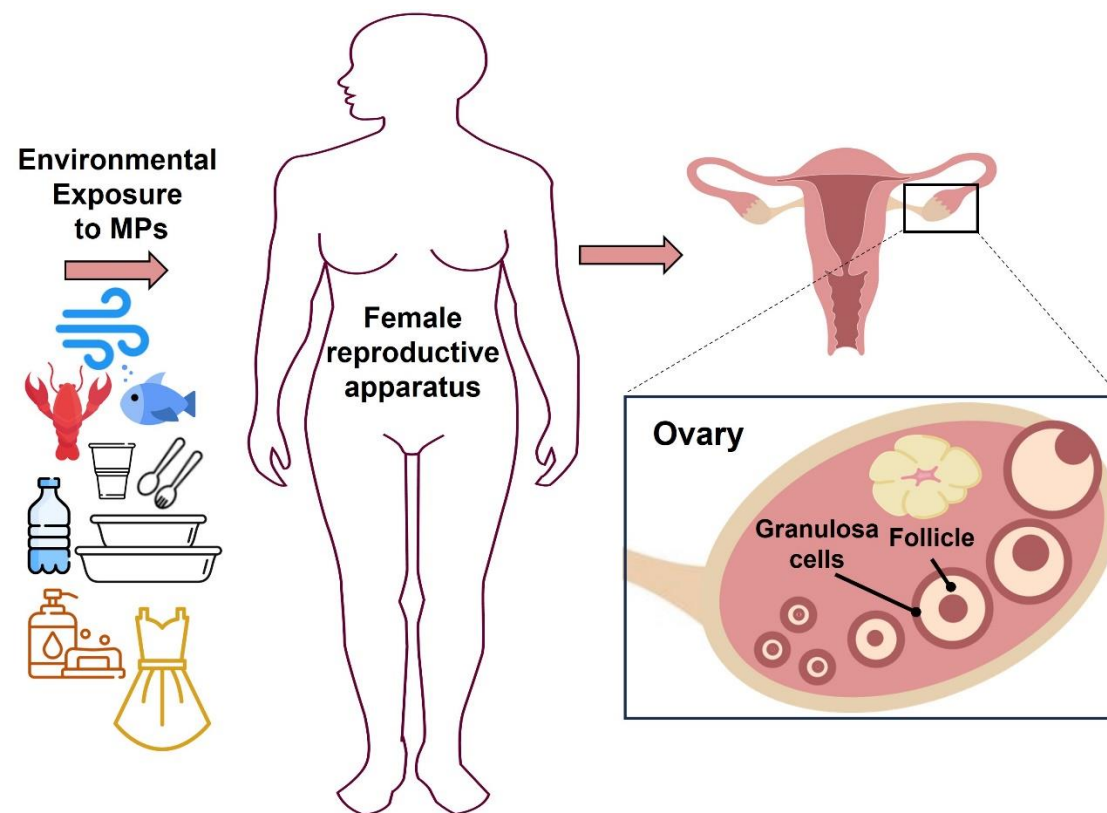

217

218 **Figure 3.** Schematization of the mechanism by which MPs pass into the ovarian follicular fluid: through environmental exposure (inhalation, ingestion  
219 and dermal contact) they enter the human body, reaching the female reproductive apparatus, particularly crossing the blood-follicle barrier.

220 Tests done in rodents reveal that MPs reach the vaginal canal and appear to induce a reduction in follicle number while boosting ovarian oxidative  
221 stress and apoptosis in granulosa cells. In addition, maternal exposure to MPs enhanced oxidative stress in oocytes while decreasing polar body  
222 extrusion. Oral administration of MPs in gravid mice resulted in a faster rate of embryonic resorption and placental and fetal development (Yang,  
223 2023). Moreover, MPs may alter oocyte maturation and function, resulting in decreased fertility (Zhang et al., 2023). In this work, the authors  
224 demonstrated that the administration of PS-MPs impaired oocyte maturation and decreased the quality of oocytes by promoting apoptosis via increased

225 ROS levels. Furthermore, in combination with DEHP, PS-MPs synergistically activated the CNR1/CRBN/YY1/CYP2E1 and Hippo pathways and  
226 induced ovarian granulosa cell cycle arrest and necroptosis via the generation of OS and DNA oxidative damage (Wu et al., 2023). In summary,  
227 exposure to MPs may exacerbate several reproductive toxicities in female mammals, mainly through OS, apoptosis and fibrosis. These mechanisms  
228 may ultimately lead to a range of structural and functional reproductive alterations, including reduced oocyte numbers, impaired follicular growth,  
229 granulosa cell apoptosis, reduced ovarian reserve function, and uterine and ovarian fibrosis. After all, studies have shown that the accumulation of  
230 ROS can lead to apoptosis of GCs and cause follicular atresia in mice (Shen et al., 2012), which may be the causal factor resulting in anovulatory  
231 infertility (Liu et al., 2019; Wang et al., 2018). Wei et al. (Wei et al., 2022) exposed male and female mice to fluorescent PS-MPs of 5.0–5.9  $\mu\text{m}$   
232 diameter, for two days and found that fluorescent PS-MPs had entered the testes and ovaries of the mice being more fluorescent PS-MPs in the ovaries  
233 than in the testes. Moreover, they found that the ovary size in the PS-MPs treatment group was smaller and the number of follicles in the PS-MPs  
234 treatment groups at each stage was lower than that of the control group.

235 The ovary is an important reproductive and endocrine organ that produces oocytes and secretes steroid hormones. It is particularly prone to be affected  
236 by many environmental substances. A recent study found that MPs accumulated in rats' ovaries, inducing granulosa cell apoptosis through oxidative  
237 stress and fibrosis of the ovary via Wnt/ $\beta$ -Catenin signaling pathway activation (An et al., 2021) and causing abnormal folliculogenesis (Haddadi et  
238 al., 2022). The follicle is the basic structural unit of the ovary, which can be divided into preantral follicles and antral follicles. During the growth of  
239 the oocyte, the follicle is filled with follicular fluid, which plays a crucial role in the maturation and development of the oocyte. Haddadi et al. (Haddadi  
240 et al., 2022) assessed the impact of oral exposure, during four estrous cycles, of 5  $\mu\text{m}$  PS-MPs on ovarian function in rats. They found particles of PS-  
241 MPs in the duodenum and the different compartments of the ovarian tissue. A reduced relative ovarian weights and a reduced serum concentration of  
242 estradiol were associated with the toxicity of PS-MPs, causing also an alteration in the folliculogenesis and the estrous cycle duration. These defective  
243 ovarian functions are most probably caused by the induction of oxidative stress, evidenced by increased superoxide dismutase (SOD) and catalase  
244 (CAT) activities and an increased malondialdehyde (MDA) concentration as well as a decreased protein sulfhydryl (PSH) level in the rat ovary.  
245 Moreover, they demonstrated a significant decrease in the expression of cytoskeletal proteins by immunofluorescence and RT-PCR:  $\alpha$ -tubulin and  
246 disheveled-associated activator of morphogenesis (DAAM-1) in the ovary of rats exposed to PS-MPs at proteomic and transcriptomic levels.

247 Regarding the correlation between MPs concentration and FSH, an interesting study on mice was focused on examining the various impacts of PS-  
248 MPs on the reproductive systems of both female and male mice, as well as assessing the impact of PS-MPs exposure on their fertility. Results indicated  
249 that PS-MPs led to greater accumulation and oxidative stress in the ovary compared to the testis, reduced ovary size and follicle number, increased  
250 FSH levels (Wei et al., 2022).

251 As for the weak correlation found between MPs concentration and BMI, in current literature the “obesogen” effects of these particles on cells are well  
252 described, in fact, Kannan & Vimalkumar (Kannan and Vimalkumar, 2021) reported this phenomenon in kidney and liver cells for MPs <20 µm, in  
253 which MPs altered energy and fatty acid metabolism that can affect, in the end, body weight. In mice the obesogenic role of MPs was explained in  
254 perturbing the gut-liver-adipose axis and altering nuclear receptor signaling and intermediary metabolism by Zhao et al., (Zhao et al., 2024) . Jeong  
255 et al. demonstrated, through omic analyses, that environmental NPs can act as obesogens in childhood (Jeong et al., 2024). In the Najahi et al. study  
256 (Najahi et al., 2022), authors demonstrated that adipose mesenchymal stromal cells, when exposed to MPs <1 µm, these do not differentiate in the  
257 normal programmed tissue. Additionally, there may also be some effect on E2, considering that microplastics have been shown to have a negative  
258 effect on granulosa cells, which produce this estrogen (An et al., 2021). Of course, these evaluations are based on still limited numbers, so more  
259 extensive recruitment is necessary to have more reliable elaborations on the effects of these emerging contaminants on the reproductive function of  
260 human females (Geng et al., 2023; Zurub et al., 2024).

261

## 262 **5. Conclusion**

263 Once again plastic molecules were found to invade our bodies at deeper levels. As far as we know, this is the first study to provide evidence for  
264 microplastics' presence in ovarian follicular fluid in women undergoing assisted reproductive treatment. Although a certain relationship between  
265 quantities of MPs and some important parameters for the regulation of ovarian function has been observed in this study, albeit needing to be evaluated  
266 with more consistent numbers, it indicates the need to continue in this direction to better understand the effects of these emerging contaminants on  
267 female reproductive health. Therefore, this study should be considered extremely relevant for the scientific community.

268 **Declaration of competing interest**

269 The authors declare that they have no known competing financial interests or personal relationships that could have appeared to influence the work  
270 reported in this paper.

271

272 **CRedit authorship contribution statement**

273 Luigi Montano: Conceptualization; project administration; writing of the original draft; Writing -review & editing; Supervision. Salvatore Raimondo:  
274 investigation, data curation, resources, Writing - review & editing. Marina Piscopo: writing of the original draft, Writing - review & editing. Maria  
275 Ricciardi: writing of the original draft; Writing - review & editing. Antonino Guglielmino: review & editing, visualization. Sandrine Chamayou:  
276 review & editing; visualization. Raffaella Gentile; visualization. Mariacira Gentile: visualization. Paola Rapisarda: investigations; writing of the  
277 original draft; Writing-review & editing. Gea Oliveri Conti: investigations; writing of the original draft; Writing-review & editing. Margherita  
278 Ferrante: conceptualization; resources, data curation, software, validation, formal analysis; writing of the original draft; Writing-review & editing.  
279 Oriana Motta: Conceptualization; resources, writing of the original draft; Writing-review & editing; Supervision.

280

281 **Institutional Review Board Statement:** Informed consent was obtained from all subjects involved in the study. The study was conducted under the  
282 Declaration of Helsinki and the Italian Code regarding the protection of personal data (Legislative Decree 196/2003) and falls within the scope of the  
283 EcoFoodFertility project (<https://www.ecofoodfertility.it>, accessed on 08 Febr 2024), approved by the Ethical Committee of the Local Health  
284 Authority Campania Sud-Salerno (Committee code n. 43 of 30 June 2015) Italy; the participants were informed about the general purpose of the  
285 research, the anonymity of the answers, and the voluntary nature of participation, and they signed informed consent. There were no incentives given.

286

287 **Informed Consent Statement:** Informed consent was obtained from all subjects involved in the study.

288 **Acknowledgment** This study forms part of the EcoFoodFertility project, which is a multicenter biomonitoring study to develop a better understanding  
289 of the environmental impact of toxicants on human health, especially reproductive health.

290

## 291 **References**

292

- 293 Aitken, R.J., 2022. The changing tide of human fertility. *Human Reproduction* 37, 629–638. <https://doi.org/10.1093/humrep/deac011>
- 294 An, R., Wang, X., Yang, L., Zhang, J., Wang, N., Xu, F., Hou, Y., Zhang, H., Zhang, L., 2021. Polystyrene microplastics cause granulosa cells  
295 apoptosis and fibrosis in ovary through oxidative stress in rats. *Toxicology* 449, 152665. <https://doi.org/10.1016/j.tox.2020.152665>
- 296 Andrade, C., 2019. The P Value and Statistical Significance: Misunderstandings, Explanations, Challenges, and Alternatives. *Indian Journal of*  
297 *Psychological Medicine* 41, 210–215. [https://doi.org/10.4103/IJPSYM.IJPSYM\\_193\\_19](https://doi.org/10.4103/IJPSYM.IJPSYM_193_19)
- 298 Bergamo, P., Volpe, M.G., Lorenzetti, S., Mantovani, A., Notari, T., Cocca, E., Cerullo, S., Di Stasio, M., Cerino, P., Montano, L., 2016. Human  
299 semen as an early, sensitive biomarker of highly polluted living environment in healthy men: A pilot biomonitoring study on trace elements  
300 in blood and semen and their relationship with sperm quality and RedOx status. *Reproductive Toxicology* 66, 1–9.  
301 <https://doi.org/10.1016/j.reprotox.2016.07.018>
- 302 Chen, D., Anderson, C.J., 2023. Categorical data analysis, in: Tierney, R.J., Rizvi, F., Ercikan, K. (Eds.), *International Encyclopedia of Education*  
303 (Fourth Edition). Elsevier, Oxford, pp. 575–582. <https://doi.org/10.1016/B978-0-12-818630-5.10070-3>
- 304 Coffin, S., Bouwmeester, H., Brander, S., Damdimopoulou, P., Gouin, T., Hermabessiere, L., Khan, E., Koelmans, A.A., Lemieux, C.L., Teerds, K.,  
305 Wagner, M., Weisberg, S.B., Wright, S., 2022. Development and application of a health-based framework for informing regulatory action in  
306 relation to exposure of microplastic particles in California drinking water. *Microplastics and Nanoplastics* 2, 12.  
307 <https://doi.org/10.1186/s43591-022-00030-6>
- 308 Ding, T., Yan, W., Zhou, T., Shen, W., Wang, T., Li, M., Zhou, S., Wu, M., Dai, J., Huang, K., Zhang, J., Chang, J., Wang, S., 2022. Endocrine  
309 disrupting chemicals impact on ovarian aging: Evidence from epidemiological and experimental evidence. *Environmental Pollution* 305,  
310 119269. <https://doi.org/10.1016/j.envpol.2022.119269>
- 311 Ferrante, M., Pietro, Z., Allegui, C., Maria, F., Antonio, C., Pulvirenti, E., Favara, C., Chiara, C., Grasso, A., Omayma, M., Gea, O.C., Banni, M.,  
312 2022. Microplastics in fillets of Mediterranean seafood. A risk assessment study. *Environmental Research* 204, 112247.  
313 <https://doi.org/10.1016/j.envres.2021.112247>
- 314 Ferrero, G., Festa, R., Follia, L., Lettieri, G., Tarallo, S., Notari, T., Giarra, A., Marinaro, C., Pardini, B., Marano, A., Piaggieschi, G., Di Battista, C.,  
315 Trifuoggi, M., Piscopo, M., Montano, L., Naccarati, A., 2024. Small noncoding RNAs and sperm nuclear basic proteins reflect the  
316 environmental impact on germ cells. *Molecular Medicine* 30, 12. <https://doi.org/10.1186/s10020-023-00776-6>

- 317 Gallo, A., Boni, R., Tosti, E., 2020. Gamete quality in a multistressor environment. *Environment International* 138, 105627.  
318 <https://doi.org/10.1016/j.envint.2020.105627>
- 319 Garrido Gamarro, E., 2022. Microplastics in food commodities: A food safety review on human exposure through dietary sources, *Food Safety and*  
320 *Quality Series*. FAO, Rome, Italy. <https://doi.org/10.4060/cc2392en>
- 321 Geng, Y., Liu, Z., Hu, R., Huang, Y., Li, F., Ma, W., Wu, X., Dong, H., Song, K., Xu, X., Zhang, Z., Song, Y., 2023. Toxicity of microplastics and  
322 nanoplastics: invisible killers of female fertility and offspring health. *Front. Physiol.* 14. <https://doi.org/10.3389/fphys.2023.1254886>
- 323 Gosden, R.G., Hunter, R.H., Telfer, E., Torrance, C., Brown, N., 1988. Physiological factors underlying the formation of ovarian follicular fluid. *J*  
324 *Reprod Fertil* 82, 813–825. <https://doi.org/10.1530/jrf.0.0820813>
- 325 Haddadi, A., Kessabi, K., Boughammoura, S., Rhouma, M.B., Mlouka, R., Banni, M., Messaoudi, I., 2022. Exposure to microplastics leads to a  
326 defective ovarian function and change in cytoskeleton protein expression in rat. *Environ Sci Pollut Res* 29, 34594–34606.  
327 <https://doi.org/10.1007/s11356-021-18218-3>
- 328 Hou, B., Wang, F., Liu, T., Wang, Z., 2021. Reproductive toxicity of polystyrene microplastics: In vivo experimental study on testicular toxicity in  
329 mice. *Journal of Hazardous Materials* 405, 124028. <https://doi.org/10.1016/j.jhazmat.2020.124028>
- 330 Huang, J., Zou, L., Bao, M., Feng, Q., Xia, W., Zhu, C., 2023. Toxicity of polystyrene nanoparticles for mouse ovary and cultured human granulosa  
331 cells. *Ecotoxicology and Environmental Safety* 249, 114371. <https://doi.org/10.1016/j.ecoenv.2022.114371>
- 332 Huang, Z., Weng, Y., Shen, Q., Zhao, Y., Jin, Y., 2021. Microplastic: A potential threat to human and animal health by interfering with the intestinal  
333 barrier function and changing the intestinal microenvironment. *Science of The Total Environment* 785, 147365.  
334 <https://doi.org/10.1016/j.scitotenv.2021.147365>
- 335 Jeong, B., Kim, J.-S., Kwon, A.R., Lee, J., Park, S., Koo, J., Lee, W.S., Baek, J.Y., Shin, W.-H., Lee, J.-S., Jeong, J., Kim, W.K., Jung, C.-R., Kim,  
336 N.-S., Cho, S.-H., Lee, D.Y., 2024. Maternal nanoplastic ingestion induces an increase in offspring body weight through altered lipid species  
337 and microbiota. *Environment International* 185, 108522. <https://doi.org/10.1016/j.envint.2024.108522>
- 338 Kannan, K., Vimalkumar, K., 2021. A Review of Human Exposure to Microplastics and Insights Into Microplastics as Obesogens. *Frontiers in*  
339 *Endocrinology* 12.
- 340 Kutralam-Muniasamy, G., Shruti, V.C., Pérez-Guevara, F., Roy, P.D., 2023. Microplastic diagnostics in humans: “The 3Ps” Progress, problems, and  
341 prospects. *Science of The Total Environment* 856, 159164. <https://doi.org/10.1016/j.scitotenv.2022.159164>
- 342 Leslie, H.A., van Velzen, M.J.M., Brandsma, S.H., Vethaak, A.D., Garcia-Vallejo, J.J., Lamoree, M.H., 2022. Discovery and quantification of plastic  
343 particle pollution in human blood. *Environment International* 163, 107199. <https://doi.org/10.1016/j.envint.2022.107199>
- 344 Lettieri, G., D’Agostino, G., Mele, E., Cardito, C., Esposito, R., Cimmino, A., Giarra, A., Trifuoggi, M., Raimondo, S., Notari, T., Febbraio, F.,  
345 Montano, L., Piscopo, M., 2020. Discovery of the Involvement in DNA Oxidative Damage of Human Sperm Nuclear Basic Proteins of Healthy  
346 Young Men Living in Polluted Areas. *International Journal of Molecular Sciences* 21, 4198. <https://doi.org/10.3390/ijms21124198>
- 347 Levine, H., Jørgensen, N., Martino-Andrade, A., Mendiola, J., Weksler-Derri, D., Jolles, M., Pinotti, R., Swan, S.H., 2023. Temporal trends in sperm  
348 count: a systematic review and meta-regression analysis of samples collected globally in the 20th and 21st centuries. *Human Reproduction*  
349 *Update* 29, 157–176. <https://doi.org/10.1093/humupd/dmac035>
- 350 Lim, X., 2021. Microplastics are everywhere — but are they harmful? *Nature* 593, 22–25. <https://doi.org/10.1038/d41586-021-01143-3>



- 351 Liu, S., Shen, M., Li, C., Wei, Y., Meng, X., Li, R., Cao, Y., Wu, W., Liu, H., 2019. PKC $\delta$  contributes to oxidative stress-induced apoptosis in porcine  
352 ovarian granulosa cells via activating JNK. *Theriogenology* 131, 89–95. <https://doi.org/10.1016/j.theriogenology.2019.03.023>
- 353 Liu, Y., Ben, Y., Che, R., Peng, C., Li, J., Wang, F., 2023. Uptake, transport and accumulation of micro- and nano-plastics in terrestrial plants and  
354 health risk associated with their transfer to food chain - A mini review. *Science of The Total Environment* 902, 166045.  
355 <https://doi.org/10.1016/j.scitotenv.2023.166045>
- 356 Montano, L., 2020. Reproductive Biomarkers as Early Indicators for Assessing Environmental Health Risk, in: *Hazardous Waste Management and*  
357 *Health Risks*. Bentham Science Publisher, Sharjah, United Arab Emirates, pp. 113-145 (33).
- 358 Montano, L., Bergamo, P., Lorenzetti, M.G.A. and S., Montano, L., Bergamo, P., Lorenzetti, M.G.A. and S., 2018. The Role of Human Semen as an  
359 Early and Reliable Tool of Environmental Impact Assessment on Human Health, in: *Spermatozoa - Facts and Perspectives*. IntechOpen.  
360 <https://doi.org/10.5772/intechopen.73231>
- 361 Montano, L., Giorgini, E., Notarstefano, V., Notari, T., Ricciardi, M., Piscopo, M., Motta, O., 2023. Raman Microspectroscopy evidence of  
362 microplastics in human semen. *Science of The Total Environment* 901, 165922. <https://doi.org/10.1016/j.scitotenv.2023.165922>
- 363 Najahi, H., Alessio, N., Squillaro, T., Conti, G.O., Ferrante, M., Di Bernardo, G., Galderisi, U., Messaoudi, I., Minucci, S., Banni, M., 2022.  
364 Environmental microplastics (EMPs) exposure alter the differentiation potential of mesenchymal stromal cells. *Environmental Research* 214,  
365 114088. <https://doi.org/10.1016/j.envres.2022.114088>
- 366 Oliveri Conti, G., Ferrante, M., Banni, M., Favara, C., Nicolosi, I., Cristaldi, A., Fiore, M., Zuccarello, P., 2020. Micro- and nano-plastics in edible  
367 fruit and vegetables. The first diet risks assessment for the general population. *Environmental Research* 187, 109677.  
368 <https://doi.org/10.1016/j.envres.2020.109677>
- 369 Pan, J., Liu, P., Yu, X., Zhang, Z., Liu, J., 2024. The adverse role of endocrine disrupting chemicals in the reproductive system. *Front. Endocrinol.*  
370 14. <https://doi.org/10.3389/fendo.2023.1324993>
- 371 Park, Eun-Jung, Han, J.-S., Park, Eun-Jun, Seong, E., Lee, G.-H., Kim, D.-W., Son, H.-Y., Han, H.-Y., Lee, B.-S., 2020. Repeated-oral dose toxicity  
372 of polyethylene microplastics and the possible implications on reproduction and development of the next generation. *Toxicol Lett* 324, 75–85.  
373 <https://doi.org/10.1016/j.toxlet.2020.01.008>
- 374 Petro, E.M.L., Leroy, J.L.M.R., Covaci, A., Franssen, E., De Neubourg, D., Dirtu, A.C., De Pauw, I., Bols, P.E.J., 2012. Endocrine-disrupting chemicals  
375 in human follicular fluid impair in vitro oocyte developmental competence. *Human Reproduction* 27, 1025–1033.  
376 <https://doi.org/10.1093/humrep/der448>
- 377 Pironti, C., Notarstefano, V., Ricciardi, M., Motta, O., Giorgini, E., Montano, L., 2023. First Evidence of Microplastics in Human Urine, a Preliminary  
378 Study of Intake in the Human Body. *Toxics* 11, 40. <https://doi.org/10.3390/toxics11010040>
- 379 Pironti, C., Ricciardi, M., Motta, O., Miele, Y., Proto, A., Montano, L., 2021. Microplastics in the Environment: Intake through the Food Web, Human  
380 Exposure and Toxicological Effects. *Toxics* 9, 224. <https://doi.org/10.3390/toxics9090224>
- 381 Pulvirenti, E., Ferrante, M., Barbera, N., Favara, C., Aquilia, E., Palella, M., Cristaldi, A., Conti, G.O., Fiore, M., 2022. Effects of Nano and  
382 Microplastics on the Inflammatory Process: In Vitro and In Vivo Studies Systematic Review. *FBL* 27, 287.  
383 <https://doi.org/10.31083/j.fbl2710287>



- 384 Qian, N., Gao, X., Lang, X., Deng, H., Bratu, T.M., Chen, Q., Stapleton, P., Yan, B., Min, W., 2024. Rapid single-particle chemical imaging of  
385 nanoplastics by SRS microscopy. *Proceedings of the National Academy of Sciences* 121, e2300582121.  
386 <https://doi.org/10.1073/pnas.2300582121>
- 387 Rangel-Buitrago, N., Neal, W.J., 2023. A geological perspective of plastic pollution. *Science of The Total Environment* 893, 164867.  
388 <https://doi.org/10.1016/j.scitotenv.2023.164867>
- 389 Ricciardi, M., Pironti, C., Motta, O., Miele, Y., Proto, A., Montano, L., 2021. Microplastics in the Aquatic Environment: Occurrence, Persistence,  
390 Analysis, and Human Exposure. *Water* 13, 973. <https://doi.org/10.3390/w13070973>
- 391 Schell, T., Rico, A., Cherta, L., Nozal, L., Dafouz, R., Giacchini, R., Vighi, M., 2022. Influence of microplastics on the bioconcentration of organic  
392 contaminants in fish: Is the “Trojan horse” effect a matter of concern? *Environmental Pollution* 306, 119473.  
393 <https://doi.org/10.1016/j.envpol.2022.119473>
- 394 Shen, M., Lin, F., Zhang, J., Tang, Y., Chen, W.-K., Liu, H., 2012. Involvement of the Up-regulated FoxO1 Expression in Follicular Granulosa Cell  
395 Apoptosis Induced by Oxidative Stress\*. *Journal of Biological Chemistry* 287, 25727–25740. <https://doi.org/10.1074/jbc.M112.349902>
- 396 Ullah, Sana, Ahmad, S., Guo, X., Ullah, Saleem, Ullah, Sana, Nabi, G., Wanghe, K., 2023. A review of the endocrine disrupting effects of micro and  
397 nano plastic and their associated chemicals in mammals. *Frontiers in Endocrinology* 13.
- 398 UNEP, 2021. United Nations Environment Programme (2021). Drowning in Plastics – Marine Litter and Plastic Waste Vital Graphics.
- 399 Wang, D., Wang, W., Liang, Q., He, X., Xia, Y., Shen, S., Wang, H., Gao, Q., Wang, Y., 2018. DHEA-induced ovarian hyperfibrosis is mediated by  
400 TGF- $\beta$  signaling pathway. *Journal of Ovarian Research* 11, 6. <https://doi.org/10.1186/s13048-017-0375-7>
- 401 Wang, J., Li, Y., Lu, L., Zheng, M., Zhang, X., Tian, H., Wang, W., Ru, S., 2019. Polystyrene microplastics cause tissue damages, sex-specific  
402 reproductive disruption and transgenerational effects in marine medaka (*Oryzias melastigma*). *Environ Pollut* 254, 113024.  
403 <https://doi.org/10.1016/j.envpol.2019.113024>
- 404 Wang, S., Han, Q., Wei, Z., Wang, Y., Xie, J., Chen, M., 2022. Polystyrene microplastics affect learning and memory in mice by inducing oxidative  
405 stress and decreasing the level of acetylcholine. *Food and Chemical Toxicology* 162, 112904. <https://doi.org/10.1016/j.fct.2022.112904>
- 406 Wei, Z., Wang, Y., Wang, S., Xie, J., Han, Q., Chen, M., 2022. Comparing the effects of polystyrene microplastics exposure on reproduction and  
407 fertility in male and female mice. *Toxicology* 465, 153059. <https://doi.org/10.1016/j.tox.2021.153059>
- 408 WHO, 2023. Infertility Prevalence Estimates, 1990–2021 [WWW Document]. URL <https://www.who.int/publications-detail-redirect/978920068315>  
409 (accessed 3.28.24).
- 410 Wu, H., Liu, Q., Yang, N., Xu, S., 2023. Polystyrene-microplastics and DEHP co-exposure induced DNA damage, cell cycle arrest and necroptosis  
411 of ovarian granulosa cells in mice by promoting ROS production. *Science of The Total Environment* 871, 161962.  
412 <https://doi.org/10.1016/j.scitotenv.2023.161962>
- 413 Xu, W., Yuan, Yangyang, Tian, Y., Cheng, C., Chen, Y., Zeng, L., Yuan, Yuan, Li, D., Zheng, L., Luo, T., 2023. Oral exposure to polystyrene  
414 nanoplastics reduced male fertility and even caused male infertility by inducing testicular and sperm toxicities in mice. *Journal of Hazardous*  
415 *Materials* 454, 131470. <https://doi.org/10.1016/j.jhazmat.2023.131470>
- 416 Xue, T., Guan, T., Geng, G., Zhang, Q., Zhao, Y., Zhu, T., 2021. Estimation of pregnancy losses attributable to exposure to ambient fine particles in  
417 south Asia: an epidemiological case-control study. *The Lancet Planetary Health* 5, e15–e24. [https://doi.org/10.1016/S2542-5196\(20\)30268-0](https://doi.org/10.1016/S2542-5196(20)30268-0)

- 418 Yang, 2023. SciELO - Brazil - The impact of microplastics on female reproduction and early life The impact of microplastics on female reproduction  
419 and early life. *Anim. Reprod., THEMATIC SECTION: 39TH ANNUAL MEETING OF THE ASSOCIATION OF EMBRYO*  
420 *TECHNOLOGY IN EUROPE (AETE) 20.* <https://doi.org/10.1590/1984-3143-AR2023-0037>
- 421 Yang, W., Jannatun, N., Zeng, Y., Liu, T., Zhang, G., Chen, C., Li, Y., 2022. Impacts of microplastics on immunity. *Front. Toxicol.* 4.  
422 <https://doi.org/10.3389/ftox.2022.956885>
- 423 Yang, Z., Wang, M., Feng, Z., Wang, Z., Lv, M., Chang, J., Chen, L., Wang, C., 2023. Human Microplastics Exposure and Potential Health Risks to  
424 Target Organs by Different Routes: A Review. *Curr Pollution Rep* 9, 468–485. <https://doi.org/10.1007/s40726-023-00273-8>
- 425 Zhang, C., Chen, J., Ma, S., Sun, Z., Wang, Z., 2022. Microplastics May Be a Significant Cause of Male Infertility. *Am J Mens Health* 16,  
426 15579883221096549. <https://doi.org/10.1177/15579883221096549>
- 427 Zhang, Y., Wang, X., Zhao, Y., Zhao, J., Yu, T., Yao, Y., Zhao, R., Yu, R., Liu, J., Su, J., 2023. Reproductive toxicity of microplastics in female mice  
428 and their offspring from induction of oxidative stress. *Environmental Pollution* 327, 121482. <https://doi.org/10.1016/j.envpol.2023.121482>
- 429 Zhao, J., Adiele, N., Gomes, D., Malovichko, M., Conklin, D.J., Ekuban, A., Luo, J., Gripshover, T., Watson, W.H., Banerjee, M., Smith, M.L.,  
430 Rouchka, E.C., Xu, R., Zhang, X., Gondim, D.D., Cave, M.C., O’Toole, T.E., 2024. Obesogenic polystyrene microplastic exposures disrupt  
431 the gut-liver-adipose axis. *Toxicological Sciences* 198, 210–220. <https://doi.org/10.1093/toxsci/kfae013>
- 432 Zuccarello, P., Ferrante, M., Cristaldi, A., Copat, C., Grasso, A., Sangregorio, D., Fiore, M., Oliveri Conti, G., 2019a. Exposure to microplastics  
433 (<10 µm) associated to plastic bottles mineral water consumption: The first quantitative study. *Water Research* 157, 365–371.  
434 <https://doi.org/10.1016/j.watres.2019.03.091>
- 435 Zuccarello, P., Ferrante, M., Cristaldi, A., Copat, C., Grasso, A., Sangregorio, D., Fiore, M., Oliveri Conti, G., 2019b. Reply for comment on  
436 “Exposure to microplastics (<10 µm) associated to plastic bottles mineral water consumption: The first quantitative study by Zuccarello et al.  
437 [Water Research 157 (2019) 365–371].” *Water Research* 166, 115077. <https://doi.org/10.1016/j.watres.2019.115077>
- 438 Zurub, R.E., Cariaco, Y., Wade, M.G., Bainbridge, S.A., 2024. Microplastics exposure: implications for human fertility, pregnancy and child health.  
439 *Front. Endocrinol.* 14. <https://doi.org/10.3389/fendo.2023.1330396>

440

441

442

443

444

445

446

447

## Supporting materials

448

### Summary

449

#### 1. Additional information on study participants ..... 26

450

**Table S1.** Detailed information on all participant parameters. .... 26

451

**Table S2.** Detailed information on all participant parameters (continued). .... 27

452

**Table S3.** Detailed information on all participant parameters (continued). .... 29

453

#### 2. Statistical analyses..... 30

454

**Table S4.** Interpretation of the  $r$  value..... 30

455

**Figure S1.** Correlation graph between number of MPs and FSH. .... 31

456

**Figure S2.** Correlation graph between number of MPs and BMI..... 32

457

**Figure S3.** Correlation graph between number of MPs and AGE. .... 33

458

**Figure S4.** Correlation graph between number of MPs and E2..... 34

459

460

461

462

463

464

465 **1. Additional information on study participants**

466 **Table S1.** Detailed information on all participant parameters.

| ID sam<br>ples | MPs<br><10µm<br>(p/ml) | average<br>diameter<br>µm<br>(particles<br><10 µm) | age   | BMI  | waist | waist-<br>to-hip<br>ratio | nullipar<br>ous | multiparo<br>us | contrace<br>ptives | previous assisted<br>reproduction procedures |       |      |
|----------------|------------------------|----------------------------------------------------|-------|------|-------|---------------------------|-----------------|-----------------|--------------------|----------------------------------------------|-------|------|
|                |                        |                                                    |       |      |       |                           |                 |                 |                    | IUI                                          | FIVET | ICSI |
| 1              | 442                    | 4.12                                               | 31-35 | 23.4 | 85    | 0.73                      | yes             | no              | yes                | 1                                            | 0     | 2    |
| 2              | 2276                   | 4.78                                               | 31-35 | 30.2 | 88    | 0.92                      | no              | 1               | yes                | 0                                            | 0     | 1    |
| 3              | 1101                   | 4.58                                               | 25-30 | 25.0 | 70    | 0.55                      | yes             | no              | yes                | 0                                            | 0     | 0    |
| 4              | 5600                   | 4.94                                               | 35-40 | 33   | 80    | 0.9                       | yes             | no              | yes                | 0                                            | 0     | 0    |
| 5              | 3601                   | 3.9                                                | 35-40 | 38   | 110   | 0.95                      | yes             | no              | yes                | 2                                            | 0     | 0    |
| 6              | 3736                   | 5.5                                                | 40-45 | 27   | 105   | 0.5                       | yes             | no              | yes                | 3                                            | 1     | 0    |
| 7              | 4566                   | 3.66                                               | 31-35 | 23   | 71    | 0.78                      | yes             | no              | no                 | 0                                            | 0     | 0    |
| 8              | 0                      |                                                    | 31-35 | 25   | 96    | 0.8                       | yes             | no              | no                 | 3                                            | 0     | 1    |
| 9              | 4326                   | 4.76                                               | 40-45 | 24   | 74    | 0.68                      | no              | 1               | no                 | 0                                            | 0     | 0    |
| 10             | 0                      |                                                    | 35-40 | 27   | 70    | 0.68                      | yes             | no              | no                 | 3                                            | 0     | 0    |
| 11             | 2431                   | 5.44                                               | 35-40 | 23   | 69    | 0.7                       | yes             | no              | no                 | 0                                            | 0     | 1    |
| 12             | 0                      |                                                    | 35-40 | 29   | 81    | 0.69                      | yes             | no              | yes                | 0                                            | 0     | 1    |
| 13             | 897                    | 5.44                                               | 25-30 | 28.2 | 76    | 0.71                      | no              | 1               | yes                | 0                                            | 0     | 0    |
| 14             | 0                      |                                                    | 25-30 | 25.6 | 77    | 0.7                       | yes             | no              | yes                | 0                                            | 0     | 0    |
| 15             | 1242                   | 5.28                                               | 40-45 | 26.2 | 87    | 0.71                      | no              | 2               | yes                | 0                                            | 0     | 0    |
| 15             | 1816                   | 5.22                                               | 40-45 | 20.7 | 80    | 0.7                       | yes             | no              | no                 | 0                                            | 0     | 0    |
| 17             | 2875                   | 5.32                                               | 25-30 | 27.1 | 80    | 0.81                      | yes             | no              | no                 | 0                                            | 0     | 0    |
| 18             | 7181                   | 4.5                                                | 35-40 | 29.6 | 87.2  | 0.86                      | yes             | no              | yes                | 1                                            | 0     | 1    |

467

468

469

470 **Table S2.** Detailed information on all participant parameters (continued).

| ID samples | MPs <10µm (p/ml) | average diameter µm (particles <10 µm) | Ferriman-Gallwey     | Smoker | Alcohol    | FSH                                                   | E2    | AMH   |                                             |
|------------|------------------|----------------------------------------|----------------------|--------|------------|-------------------------------------------------------|-------|-------|---------------------------------------------|
|            |                  |                                        | score (1-5)          |        |            | mUI/mL                                                | pg/mL | ng/mL |                                             |
|            |                  |                                        | (stage of hirsutism) |        |            | blood collection from the 3rd to 5st day of the cycle |       |       |                                             |
| 1          | 442              | 4.12                                   | 1                    | No     | No         | 7.88                                                  | 29.5  | 0.5   | normovulatory                               |
| 2          | 2276             | 4.78                                   | 2                    | No     | Occasional | 7.2                                                   | 80.6  | 3.54  | normovulatory                               |
| 3          | 1101             | 4.58                                   | 1                    | si     | Occasional | 5.7                                                   | 25.0  | 7.3   | oligomenorrhea with reduced ovarian reserve |
| 4          | 5600             | 4.94                                   | 2                    | no     | no         | 7.99                                                  | 19.8  | 0.36  | oligomenorrhea with reduced ovarian reserve |
| 5          | 3601             | 3.9                                    | 2                    | Former | Occasional | 6.5                                                   | 49.0  | 0.73  | polycystic ovary syndrome                   |
| 6          | 3736             | 5.5                                    | 2                    | No     | No         | 8.9                                                   | 38.9  | 1.43  | polycystic ovary syndrome                   |
| 7          | 4566             | 3.66                                   | 2                    | Former | Occasional | 7.9                                                   | 113.7 | 5.3   | polycystic ovary syndrome                   |
| 8          | 0                |                                        | 2                    | Si     | No         | 5.8                                                   | 65.9  | 1.1   | polycystic ovary syndrome                   |

|    |      |      |   |        |    |      |       |      |                                              |
|----|------|------|---|--------|----|------|-------|------|----------------------------------------------|
| 9  | 4326 | 4.76 | 2 | Former | No | 7.1  | 47.0  | 3.93 | polycystic ovary syndrome                    |
| 10 | 0    |      | 2 | No     | No | 6.01 | 74.3  | 4.97 | polycystic ovary syndrome                    |
| 11 | 2431 | 5.44 | 1 | No     | No | 6.66 | 120.0 | 0.45 | Endometriosis + polycystic ovary syndrome    |
| 12 | 0    |      | 2 | Former | No | 5.2  | 43.7  | 0.19 | Endometriosis + polycystic ovary syndrome    |
| 13 | 897  | 5.44 | 1 | Former | No | 3.98 | 80.3  | 4.21 | normovulatory                                |
| 14 | 0    |      | 1 | Former | No | 7.84 | 54.1  | 2.04 | normovulatory                                |
| 15 | 1242 | 5.28 | 1 | No     | No | 4.9  | 36.5  | 0.09 | normovulatory + with reduced ovarian reserve |
| 15 | 1816 | 5.22 | 1 | No     | No | 4.8  | 42.2  | 1.46 | Endometriosis + polycystic ovary syndrome    |
| 17 | 2875 | 5.32 | 1 | No     | No | 4.95 | 70.3  | 3.64 | normovulatory                                |
| 18 | 7181 | 4.5  | 2 | No     | No | 8.12 | 100.4 | 2.41 | normovulatory                                |

471

472

473

474 **Table S3.** Detailed information on all participant parameters (continued).

| ID samples | MPs <10µm (p/ml) | average diameter µm (particles <10 µm) | drug therapy   | retrived ovocytes | Metaphase | Metaphase  | ferti lized oocy tes | eight-cell embryos | transfer perform ed | beta HCG > 400 UI/ml | aborti ons | live birth |
|------------|------------------|----------------------------------------|----------------|-------------------|-----------|------------|----------------------|--------------------|---------------------|----------------------|------------|------------|
|            |                  |                                        |                |                   |           |            |                      |                    |                     |                      |            |            |
|            |                  |                                        |                | Pick-up           | oocytes I | oocytes II |                      |                    |                     |                      |            |            |
| 1          | 442              | 4.12                                   |                | 6                 | 0         | 6          | 6                    | 6                  | yes                 | negative             | /          | /          |
| 2          | 2276             | 4.78                                   |                | 7                 | 0         | 7          | 7                    | 7                  | yes                 | positive             | /          | yes        |
| 3          | 1101             | 4.58                                   |                | 7                 | 0         | 7          | 7                    | 5                  | yes                 | negative             | /          | /          |
| 4          | 5600             | 4.94                                   |                | 7                 | 0         | 7          | 7                    | 6                  | yes                 | positive             | /          | yes        |
| 5          | 3601             | 3.9                                    |                | 7                 | 1         | 6          | 7                    | 6                  | yes                 | positive             | yes        | /          |
| 6          | 3736             | 5.5                                    |                | 8                 | 2         | 6          | 7                    | 7                  | yes                 | positive             | yes        | /          |
| 7          | 4566             | 3.66                                   |                | 5                 | 1         | 4          | 4                    | 1                  | no                  | negative             | /          | /          |
| 8          | 0                |                                        |                | 7                 | 0         | 7          | 7                    | 7                  | yes                 | negative             | /          | /          |
| 9          | 4326             | 4.76                                   |                | 7                 | 0         | 7          | 7                    | 7                  | yes                 | negative             | /          | /          |
| 10         | 0                |                                        |                | 8                 | 0         | 8          | 8                    | 8                  | yes                 | negative             | /          | /          |
| 11         | 2431             | 5.44                                   |                | 4                 | 0         | 4          | 4                    | 4                  | yes                 | negative             | /          | /          |
| 12         | 0                |                                        |                | 9                 | 3         | 6          | 6                    | 6                  | yes                 | positive             | /          | yes        |
| 13         | 897              | 5.44                                   |                | 11                | 2         | 9          | 9                    | 9                  | yes                 | negative             | /          | /          |
| 14         | 0                |                                        | betametha sone | 5                 | 0         | 5          | 5                    | 4                  | yes                 | negative             | /          | /          |



|    |      |      |               |   |   |   |   |   |     |          |     |     |
|----|------|------|---------------|---|---|---|---|---|-----|----------|-----|-----|
| 15 | 1242 | 5.28 | betamethasone | 7 | 0 | 7 | 6 | 5 | yes | positive | yes | /   |
| 15 | 1816 | 5.22 |               | 7 | 1 | 6 | 6 | 6 | yes | positive | /   | yes |
| 17 | 2875 | 5.32 |               | 9 | 0 | 9 | 8 | 7 | yes | negative | /   | /   |
| 18 | 7181 | 4.5  |               | 6 | 0 | 6 | 6 | 6 | yes | positive | yes | /   |

475

476

477

478

479

## 480 2. Statistical analyses

481 **Table S4.** Interpretation of the  $r$  value.

| $r$ value         | Interpretation                       |
|-------------------|--------------------------------------|
| $r=1$             | Perfect positive linear correlation  |
| $1>r\geq 0.8$     | Strong positive linear correlation   |
| $0.8>r\geq 0.4$   | Moderate positive linear correlation |
| $0.4>r>0$         | Weak positive linear correlation     |
| $r=0$             | No correlation                       |
| $0>r\geq -0.4$    | Weak negative linear correlation     |
| $-0.4>r\geq -0.8$ | Moderate negative linear correlation |
| $-0.8>r>-1$       | Strong negative linear correlation   |
| $r=-1$            | Perfect negative linear correlation  |

482

483

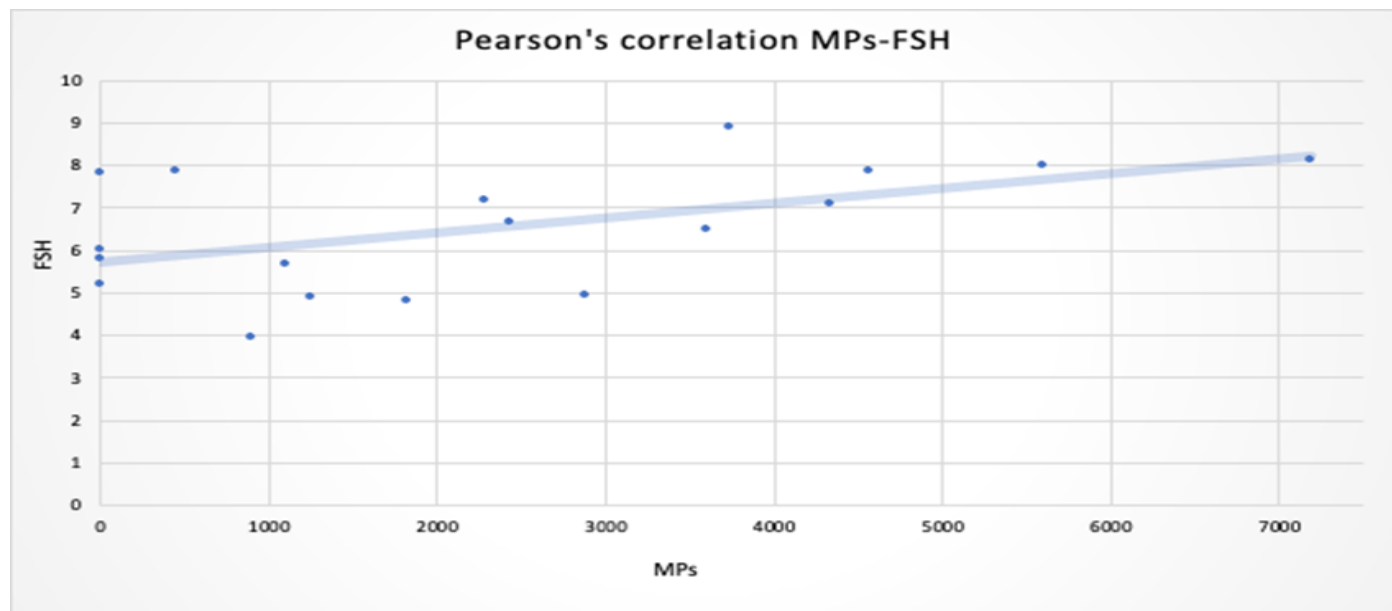

484

485 **Figure S1.** Correlation graph between number of MP's and FSH.

486

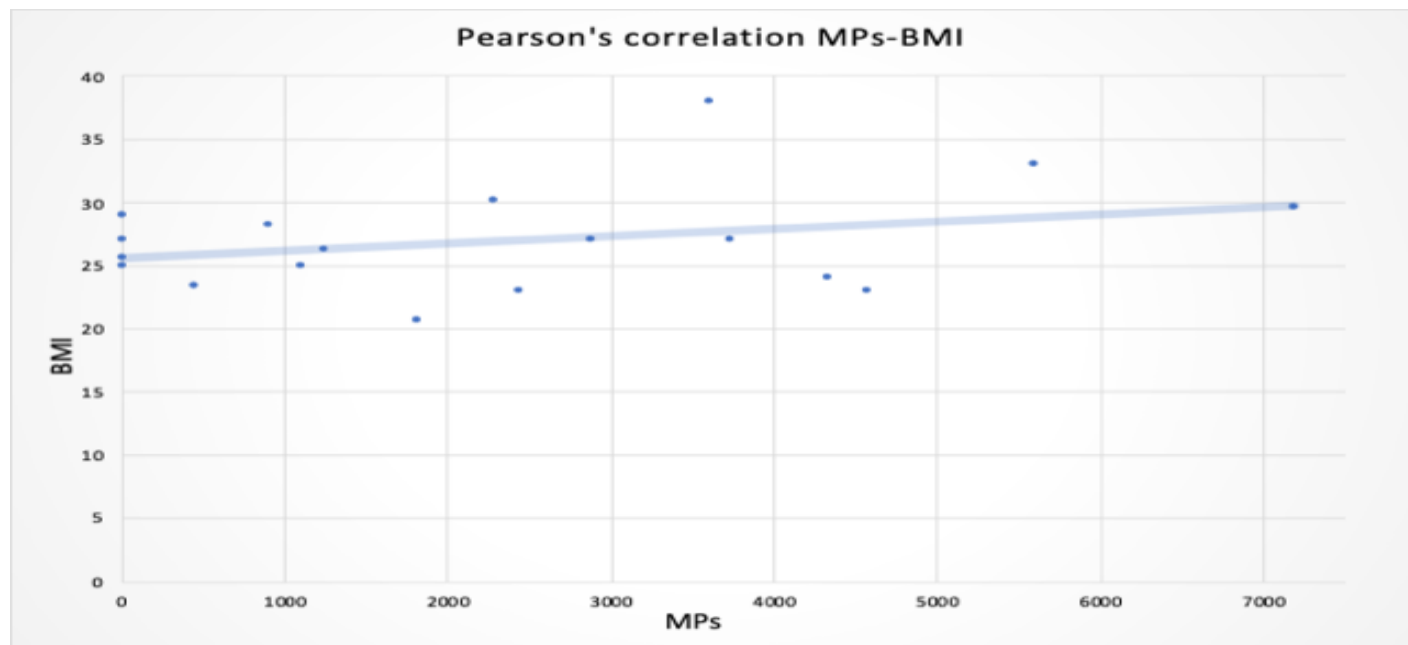

487

488 **Figure S2.** Correlation graph between number of MPs and BMI.

489

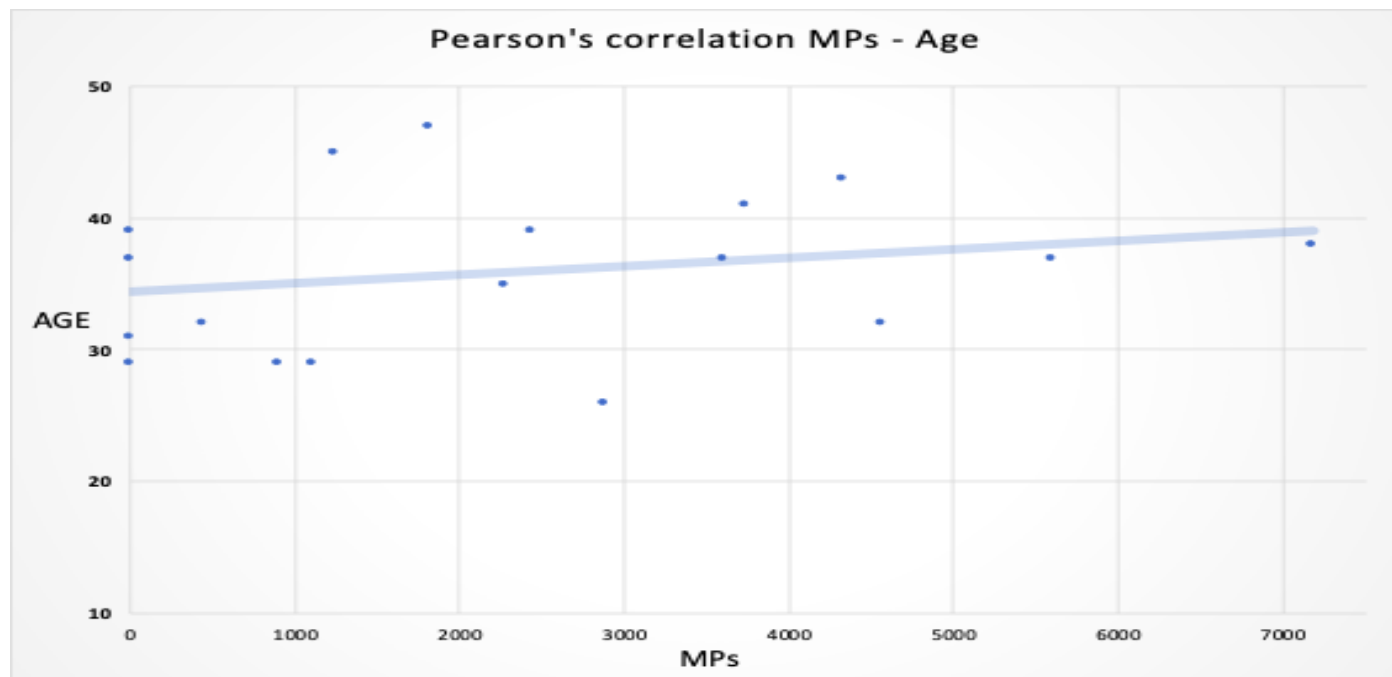

490

491

492 **Figure S3.** Correlation graph between number of MPs and Age.

493

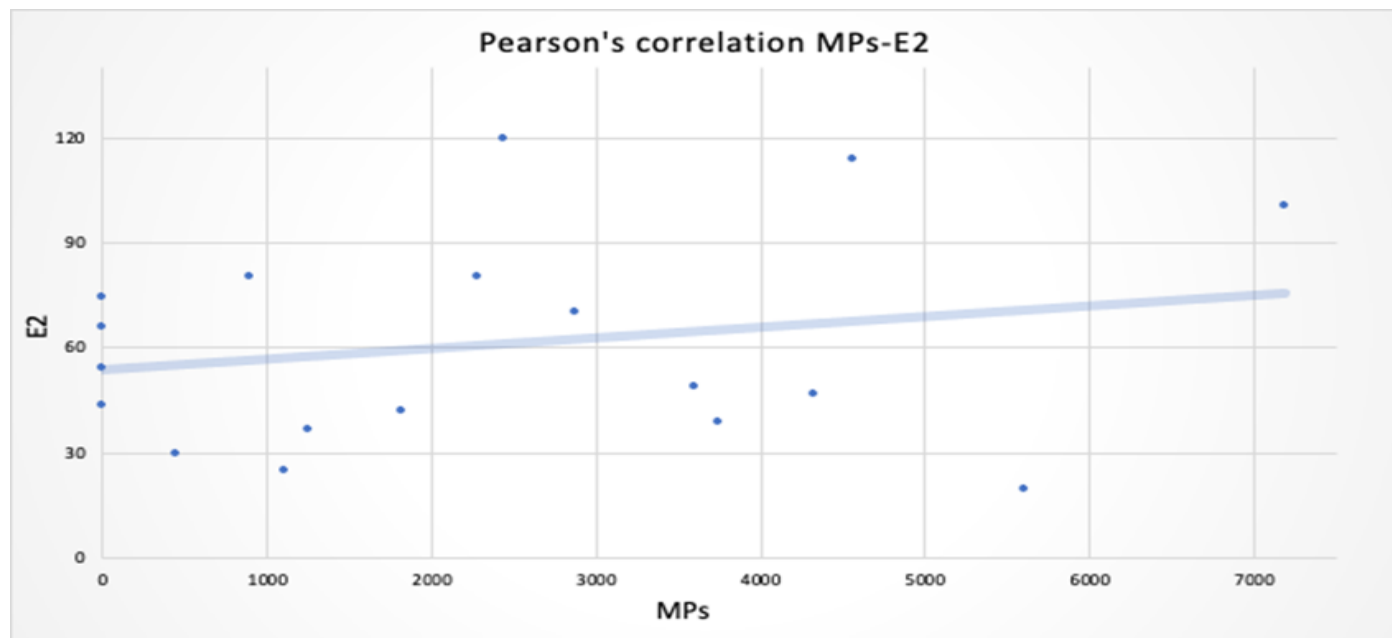

494

495 **Figure S4.** Correlation graph between number of MPs and E2.

496
